# Supplementary material for: Astrocytic CD44 Deficiency Reduces the Severity of Kainate-Induced Epilepsy
Source: MDPI journal article supplement (doi:10.3390/cells12111483), 2023-05-26
Supplement: s1 [file s1]

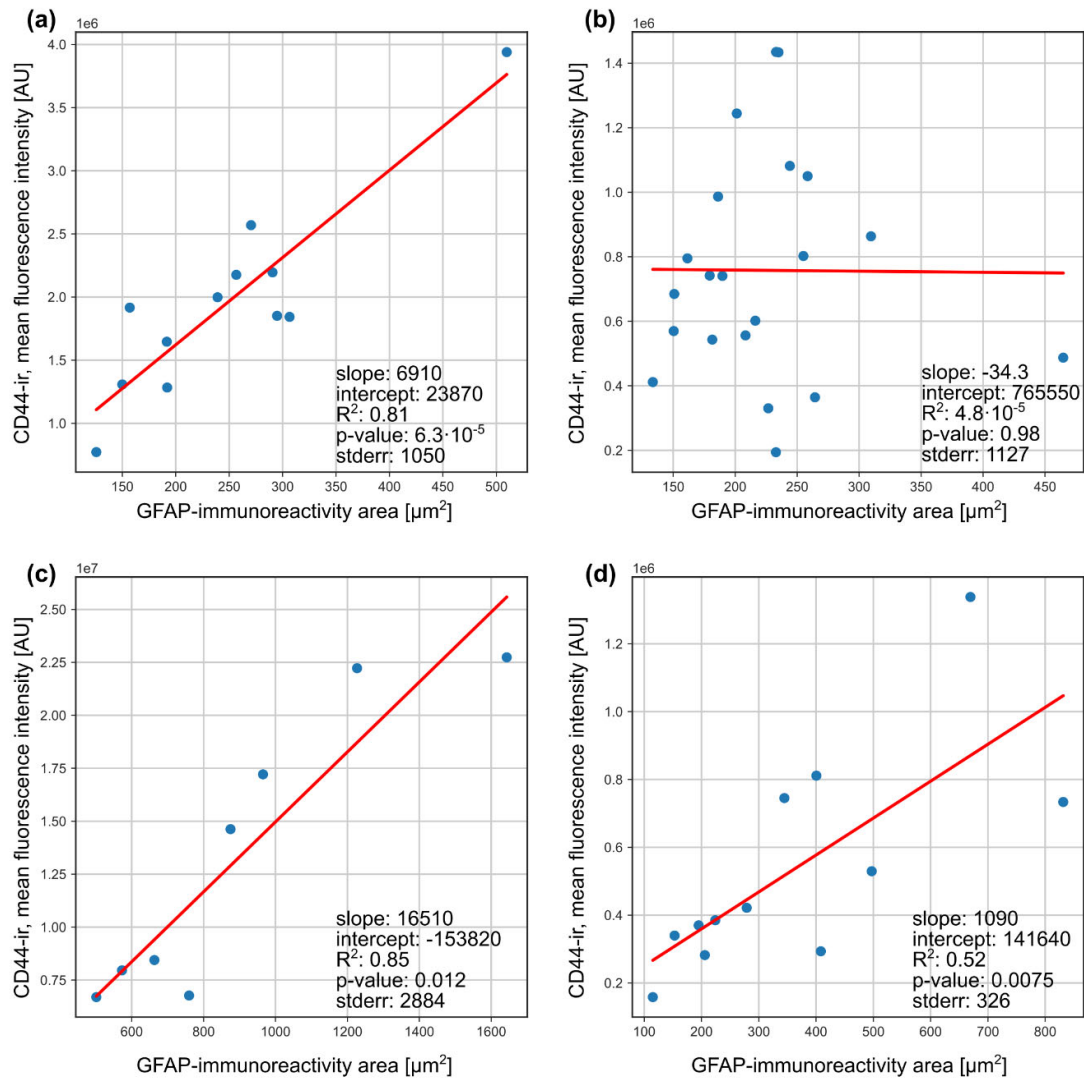

**FigureS1.** Correlation between the area of GFAP-ir and mean CD44 fluorescence for: (a): CTRL, (b) AsKO, (c) CTRL+KA, and (d) AsKO+KA groups. Statistical parameters in each panel correspond to the following parameters, respectively: slope and intercept of the fitted lines,  $R^2$  (coefficient of determination), the p-value for a hypothesis test whose null hypothesis is that the slope is zero, standard error of the estimated slope. Lines represent linear regression given by the equation (GFAP-ir intensity (y) = slope\* CD-44-ir intensity (x) + intercept).

**Table S1**

**Fig 1c**

|                       | +SA  | +KA  |
|-----------------------|------|------|
| Shapiro-Wilk p-value: | 0,33 | 0,15 |

power: 1.0

**Fig 1d**

|                       | +SA  | +KA  |
|-----------------------|------|------|
| Shapiro-Wilk p-value: | 0,06 | 0,23 |

power: 1.0

**Fig 2c**

|                       | CTRL+KA | AsKO+KA |
|-----------------------|---------|---------|
| Shapiro-Wilk p-value: | 0,63    | 0,20    |

power: 1.0

**Fig 2d**

|                       | CTRL+KA | AsKO+KA |
|-----------------------|---------|---------|
| Shapiro-Wilk p-value: | 0,75    | 0,06    |

power: 1.0

---

**Fig 3b**

|                       | CTRL+KA | AsKO+KA |
|-----------------------|---------|---------|
| Shapiro-Wilk p-value: | <0.0001 | <0.0001 |
| power: 0.31           |         |         |

**Fig 3c**

|                       | CTRL+KA | AsKO+KA |
|-----------------------|---------|---------|
| Shapiro-Wilk p-value: | 0.89    | 0.59    |
| power: 0.06           |         |         |

**Fig 3d**

|                       | CTRL+KA | AsKO+KA |
|-----------------------|---------|---------|
| Shapiro-Wilk p-value: | 0.15    | 0.06    |
| power: 0.07           |         |         |

---

**Fig 4c**

|                       | CTRL | AsKO  |
|-----------------------|------|-------|
| Shapiro-Wilk p-value: | 0.07 | 0.002 |
| power: 0.21           |      |       |

**Fig 4d**

|                       | CTRL | AsKO |
|-----------------------|------|------|
| Shapiro-Wilk p-value: | 0.14 | 0.48 |
| power:1.0             |      |      |

**Fig 4e**

|                       | CTRL+KA | AsKO+KA |
|-----------------------|---------|---------|
| Shapiro-Wilk p-value: | 0.36    | 0.17    |
| power:1.0             |         |         |

**Fig 4f**

|                       | CTRL+KA | AsKO+KA |
|-----------------------|---------|---------|
| Shapiro-Wilk p-value: | 0.09    | 0.06    |
| power: 1.0            |         |         |

**Fig 5c**

|                       | CTRL+KA | AsKO+KA |
|-----------------------|---------|---------|
| Shapiro-Wilk p-value: | 0.21    | 0.78    |
| power: 0.99           |         |         |

**Fig 5f**

|                       | CTRL | AsKO | CTRL+KA | AsKO+KA |
|-----------------------|------|------|---------|---------|
| Shapiro-Wilk p-value: | 0.18 | 0.71 | 0.44    | 0.78    |

power CTRL - CTRL+KA: 1.0

power CTRL - AsKO+KA:0.97

power AsKO - CTRL+KA:0.97

power CTRL+KA - AsKO+KA: 0.99

**Fig 5g**

|                       | CTRL+KA | AsKO+KA |
|-----------------------|---------|---------|
| Shapiro-Wilk p-value: | <0.0001 | <0.0001 |
| power: 1.0            |         |         |

**Fig 5h**

|                       | CTRL+KA | AsKO+KA |
|-----------------------|---------|---------|
| Shapiro-Wilk p-value: | <0.0001 | <0.0001 |
| power: 1.0            |         |         |

-----

**Table S1.** Additional statistical parameters
